# Supplementary material
Source: Springer Nature journal article supplement (https://www.springermedizin.de/resource/supplementary/13058_2011_2732_MOESM2_ESM.pdf/9702362)
Supplement: MOESM2 [file 9702362]

455 consecutive patients with operable breast cancer were screened for study eligibility

143 were excluded:  
42 had an early disease relapse  
44 did not have CTC assessed at any time  
15 did not have CTC assessed during follow up years: 0-2  
41 did not have CTC assessed during follow up years: 3-5  
1 had advanced stage disease

312 patients were eligible

1<sup>st</sup> & 2<sup>nd</sup> year of FU

CK-19 mRNA<sup>-</sup>  
(n=149)

CK-19 mRNA<sup>+</sup>  
(n=163)

3<sup>rd</sup> - 5<sup>th</sup> year of FU

CK-19 mRNA<sup>-</sup>  
(n=80)

CK-19 mRNA<sup>+</sup>  
(n=69)

CK-19 mRNA<sup>-</sup>  
(n=64)

CK-19 mRNA<sup>+</sup>  
(n=99)

Persistently Negative Patients

Negative Turn to Positive Patients

Positive Turn to Negative Patients

Persistently Positive Patients
